## Nanopore sequencing enables comprehensive transposable element epigenomic profiling

Adam D. Ewing<sup>1\*</sup>, Nathan Smits<sup>1</sup>, Francisco J. Sanchez-Luque<sup>2,3</sup>, Jamila Faivre<sup>4</sup>, Paul M. Brennan<sup>5</sup>, Seth W. Cheetham<sup>1\*</sup>, Geoffrey J. Faulkner<sup>1,6\*</sup>

<sup>1</sup>Mater Research Institute - University of Queensland, Woolloongabba, QLD, 4102, Australia.

<sup>2</sup>GENYO. Centre for Genomics and Oncology (Pfizer-University of Granada and Andalusian Regional Government), PTS Granada, 18016, Spain.

<sup>3</sup>MRC Human Genetics Unit, Institute of Genetics and Molecular Medicine (IGMM), University of Edinburgh, Western General Hospital, Edinburgh EH4 2XU, United Kingdom.

<sup>4</sup>INSERM, U1193, Paul-Brousse University Hospital, Hepatobiliary Centre, Villejuif 94800, France.

<sup>5</sup>Translational Neurosurgery, Centre for Clinical Brain Sciences, Edinburgh EH16 4SB, United Kingdom.

<sup>6</sup>Queensland Brain Institute, University of Queensland, St. Lucia, QLD, 4067, Australia.

\*Correspondence should be addressed to A.D.E. ([adam.ewing@mater.uq.edu.au](mailto:adam.ewing@mater.uq.edu.au)), S.W.C. ([seth.cheetham@mater.uq.edu.au](mailto:seth.cheetham@mater.uq.edu.au)) and G.J.F. ([faulknergj@gmail.com](mailto:faulknergj@gmail.com)).

### 1 **Abstract**

2 We apply long-read nanopore sequencing and a new tool, TLDR (Transposons from Long  
3 Dirty Reads), to directly infer CpG methylation of new and extant human transposable  
4 element (TE) insertions in hippocampus, heart, and liver, as well as paired tumour and non-  
5 tumour liver. Whole genome TLDR analysis greatly facilitates studies of TE biology as  
6 complete insertion sequences and their epigenetic modifications are readily obtainable.

7

### 8 **Main**

9 Transposable elements (TEs) pervade our genomic architecture and broadly influence  
10 human biology and disease<sup>1</sup>. Recently, Oxford Nanopore Technologies (ONT) long-read  
11 DNA sequencing has enabled telomere-to-telomere chromosome assembly at base pair  
12 resolution, including of high copy number TEs previously refractory to short-read mapping<sup>2-4</sup>.  
13 While most evolutionarily older TEs have accumulated sufficient nucleotide diversity to be  
14 uniquely identified, recent TE insertions are often indistinguishable from their source  
15 elements when assayed with short-read approaches.

16

17 Each diploid human genome contains 80-100 potentially mobile long interspersed element 1  
18 (LINE-1) copies, referred to here as L1Hs (L1 Human-specific)<sup>5,6</sup>. L1Hs elements encode  
19 proteins required to retrotranspose<sup>7</sup> *in cis*, and to *trans* mobilise *Alu* and *SVA*  
20 retrotransposons and processed mRNAs<sup>8-10</sup>. While the reference genome assembly  
21 contains thousands of human-specific TE copies, the vast majority of germline polymorphic

22 TEs found in the global population are non-reference<sup>11,12</sup>. L1Hs-mediated germline  
23 insertional mutagenesis is a prominent source of disease, whereas somatic L1Hs  
24 retrotransposition can occur during early embryogenesis as well as in the committed  
25 neuronal lineage, and is a common feature of many epithelial cancers<sup>13–15</sup>.

26

27 A wide array of host factors have been implicated in mammalian TE regulation<sup>16</sup>. Central  
28 among them is CpG methylation: most CpGs are located within TEs, and it has been posited  
29 that CpG methylation arose to limit the mobility of young TEs<sup>17,18</sup> whereas older TEs are  
30 controlled by repressive histone marks and other pathways. A CpG island present in the  
31 L1Hs 5'UTR is usually demethylated as a prerequisite for retrotransposition<sup>19–21</sup>. While TE  
32 methylation can be ascertained by locus-specific and genome-wide bisulfite sequencing  
33 assays, these approaches are currently limited in throughput and resolution, respectively.  
34 Here, we demonstrate the capacity of ONT sequencing to concurrently assess TE  
35 methylation and resolve new germline and somatic TE insertions.

36

37 We employed an ONT PromethION platform to sequence 5 human samples at ~15x  
38 genome-wide depth. Samples consisted of hippocampus, heart and liver tissue -  
39 representing each of the three germ layers - from an individual (CTRL-5413, female, 51yrs)  
40 without post-mortem pathology, and paired tumour/non-tumour liver tissue from a second  
41 individual (HCC33, female, 57yrs) (Fig. 1a and Supplementary Table 1). ONT analysis  
42 allowed us to compare CpG methylation amongst genomes<sup>22</sup> and between haplotypes within  
43 samples<sup>23</sup>. Examining TE subfamilies *en masse*, we observed tumour-specific L1Hs  
44 demethylation in HCC33 was more pronounced than demethylation of other young TEs, and  
45 of the genome overall (Fig. 1b and Supplementary Fig. 1). Comparing CTRL-5413 normal  
46 hippocampus, heart, and liver samples, we found L1Hs methylation decreased in that order  
47 (Fig. 1c), an effect that appeared more marked amongst older LINE-1 subfamilies  
48 (Supplementary Fig. 2). Older *Alu* subfamilies were also generally less methylated on  
49 average than younger elements (Supplementary Fig. 3). SVA methylation, in contrast, did  
50 not vary amongst the three samples or with subfamily age (Supplementary Fig. 4). Long  
51 terminal repeat (LTR5\_Hs) regions flanking the likely immobile human endogenous  
52 retrovirus K (HERV-K) family were less methylated than other TEs in normal tissues and  
53 non-tumour liver (Fig. 1b,c). Genome-wide and TE subfamily methylation were slightly lower  
54 in HCC33 non-tumour liver than CTRL-5413 normal liver (Fig. 1b,c). Composite methylation  
55 profiles spanning the previously inaccessible interiors of full-length TEs revealed a clear  
56 trough adjacent to the L1Hs 5'UTR CpG island in all samples (Fig. 2), whereas the CpG-rich  
57 VNTR (variable number of tandem repeats) core of the youngest SVA<sub>F</sub> family was more  
58 consistently methylated than its flanking SINE-R and *Alu*-like sequences (Fig. 2).

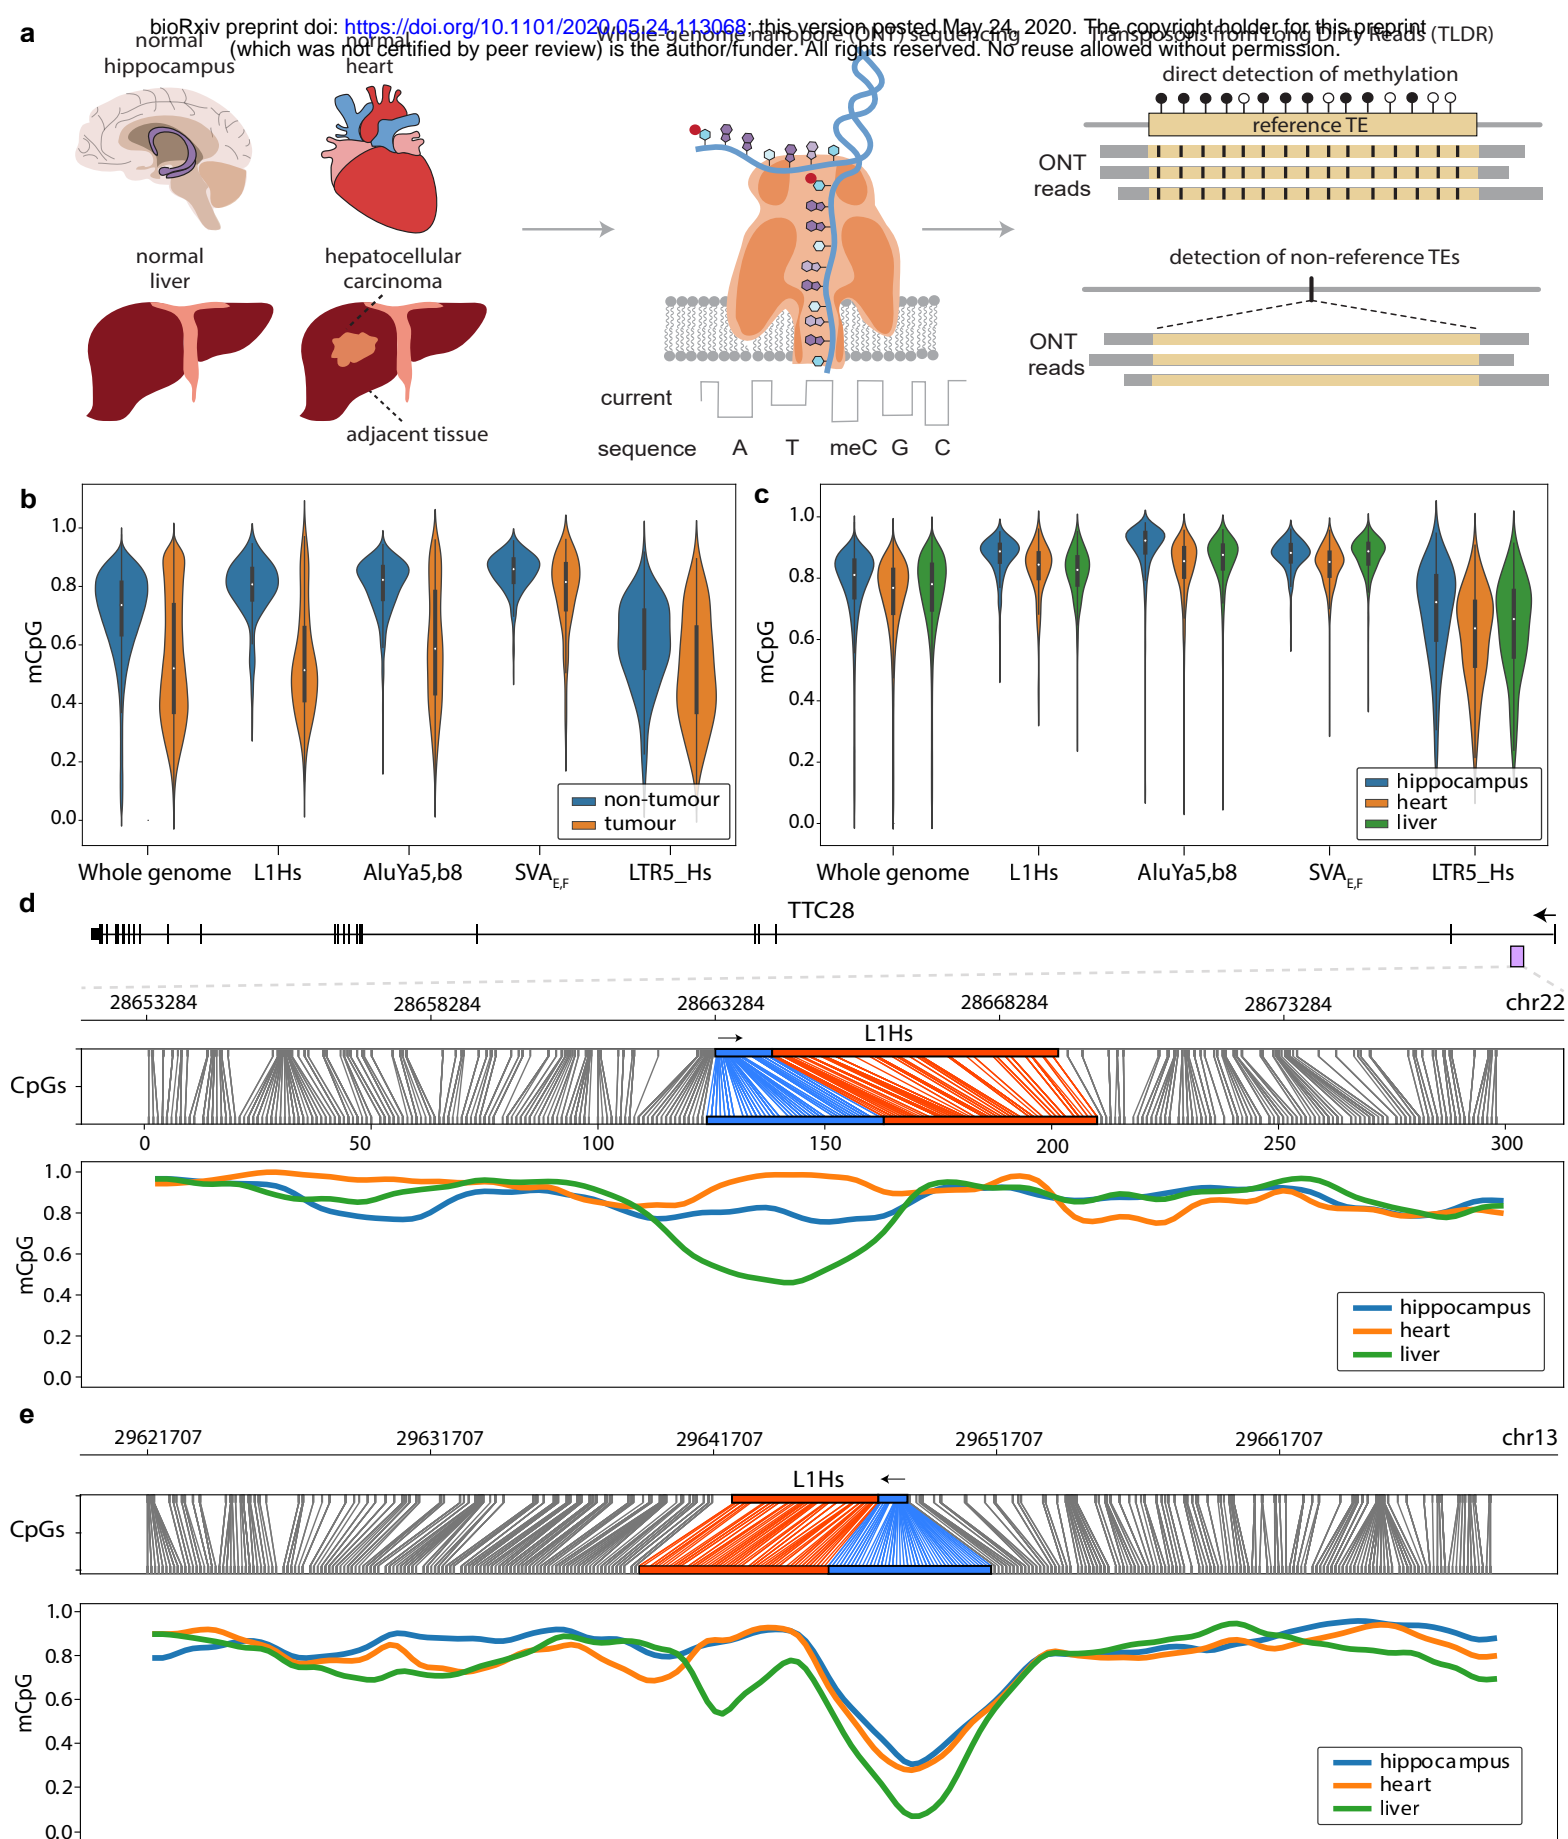

**Fig. 1: Measurement of CpG methylation on TEs.** (a) Hippocampus, heart and liver tissue from a healthy individual (CTRL-5413), as well as tumour and adjacent liver tissue from a hepatocellular carcinoma patient (HCC33), were ONT sequenced. TLDR analysis identified TE insertions and quantified TE locus-specific CpG methylation. (b) CpG methylation in HCC33 samples for the whole genome (6kbp windows), L1Hs copies >5.9kbp, young *Alu* copies >280bp (*AluYa5*, *AluYb8*), human-specific SVA copies >1kbp (*SVA<sub>E</sub>*, *SVA<sub>F</sub>*) and HERV-K flanking long terminal repeats >900bp (*LTR5\_Hs*). (c) As for (b), except for CTRL-5413 normal tissues. (d) Methylation profile of a reference L1Hs intronic to *TTC28*. A purple rectangle indicates the L1Hs position within the *TTC28* locus. Upper panel: relationship between CpG positions in genome space and CpG space. The L1Hs 5'UTR and body are highlighted in blue and orange, respectively. Lower panel: Fraction of methylated CpGs for CTRL-5413 tissues across CpG space. (e) Similar to (d), except for an intergenic L1Hs located on chromosome 13 and known to be demethylated and mobile during neurodevelopment<sup>19,27</sup>.

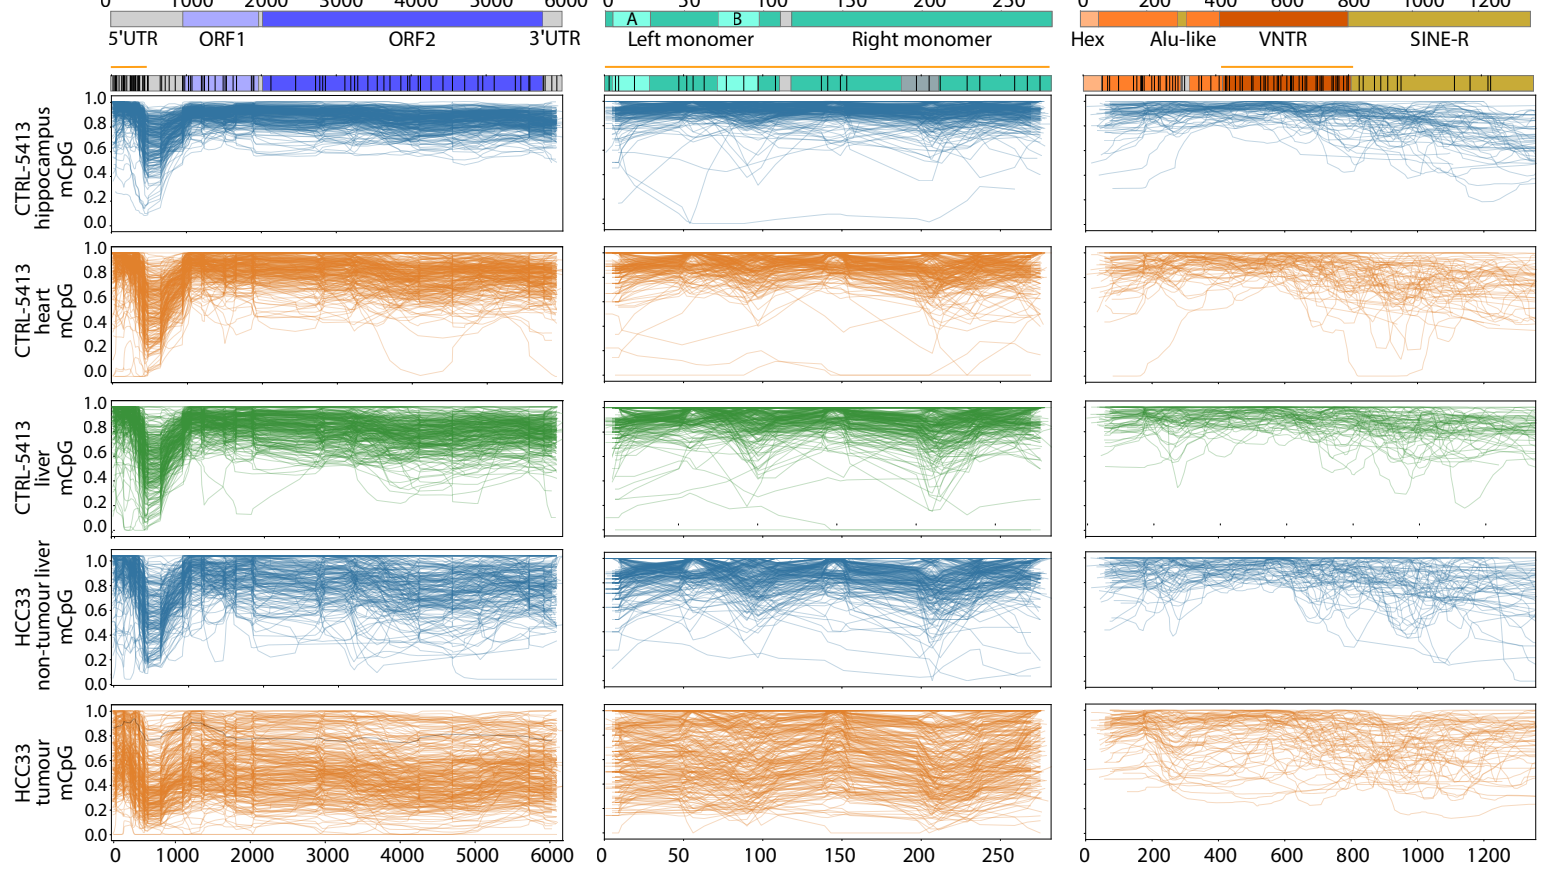

**Fig. 2: Composite methylation profiles for representative mobile human TE subfamilies.** Data are shown for L1Hs, AluYa5 and SVA<sub>F</sub> in CTRL-5413 and HCC33 samples. Each graph displays up to 300 profiles for the specified TE subfamily. Annotated TE consensus sequences are provided at top, with CpG positions (black bars) and CpG islands (orange lines) indicated.

59  
60 Whilst most TEs are constitutively methylated (Supplementary Fig. 5a) we identified striking  
61 patterns of differential methylation for individual reference genome TEs (Supplementary Fig.  
62 5b-d, Supplementary Table 2). For example, an L1Hs located intronic to the TTC28 gene  
63 and known to be mobile in liver and other cancers<sup>24-26</sup> was hypomethylated in CTRL-5413  
64 liver (Fig. 1d). A slightly 5' truncated L1Hs situated on chromosome 13 and found, thus far,  
65 to cause somatic retrotransposition during neurodevelopment in two unrelated individuals<sup>19,27</sup>  
66 was strongly demethylated in each CTRL-5413 sample (Fig. 1e). An L1Hs situated antisense  
67 and intronic to ZNF638 was similarly demethylated, particularly in CTRL-5413 heart tissue,  
68 and from its 5'UTR promoted a previously described alternative ZNF638 transcript<sup>28</sup>  
69 (Supplementary Fig. 5c). A chromosome 1 L1Hs that is mobile in the germline and cancer<sup>29</sup>,  
70 and recently highlighted as expressed in senescent fibroblasts<sup>30</sup>, was hypomethylated in  
71 CTRL-5413 heart and liver, but not hippocampus (Supplementary Fig. 5d). Despite an  
72 overall trend towards tumour-specific L1Hs demethylation in HCC33, we also noted  
73 exceptional TEs that were hypermethylated in tumour relative to non-tumour liver, such as  
74 an L1Hs copy intronic to PGAP1 (Supplementary Fig. 6). As well as examples of TEs  
75 methylated exclusive of the surrounding locus, we found TEs apparently demethylated by  
76 virtue of their genomic location (Supplementary Fig. 7). By generating read-backed phased  
77 methylation profiles<sup>23,31,32</sup> we found haplotype-specific differentially methylated regions within  
78 imprinted genes, such as GNAS and PEG3 (Supplementary Fig. 8), and in individual  
79 reference TE copies (Supplementary Fig. 9). These results highlight how haplotype-specific  
80 TE regulation can be studied - and placed amid a wider genomic context - via ONT analysis.

81  
82 To study non-reference TE insertions, we developed TLDR (Transposons from Long Dirty  
83 Reads), a software tool that detects, assembles and annotates insertions via long-read  
84 alignments, including ONT and PacBio sequencing data. A major feature of TLDR is that it  
85 can resolve entire TE insertions, along with transductions, 5' inversions, target site  
86 duplications (TSDs), 3' poly(A) tracts and other hallmarks of LINE-1 mediated  
87 retrotransposition<sup>1</sup> (Fig. 3a, Supplementary Fig. 10, and Supplementary Table 3) while  
88 achieving sensitivity similar to our short-read TE insertion detection method, TEBreak .  
89 Highlighting its capacity to detect somatic retrotransposition events, TLDR successfully re-  
90 identified both PCR-validated tumour-specific L1Hs insertions previously found by us with  
91 short-read sequencing of patient HCC33 samples<sup>33</sup>. TLDR accurately recapitulated their  
92 LINE-1 insertion features, including TSDs, and now revealed the internal breakpoint of the  
93 ~2kb 5' inversion of the EFHD1 insertion (Fig. 3a and Supplementary Table 3). No additional  
94 HCC33 tumour-specific TE insertions were found by TLDR.

95

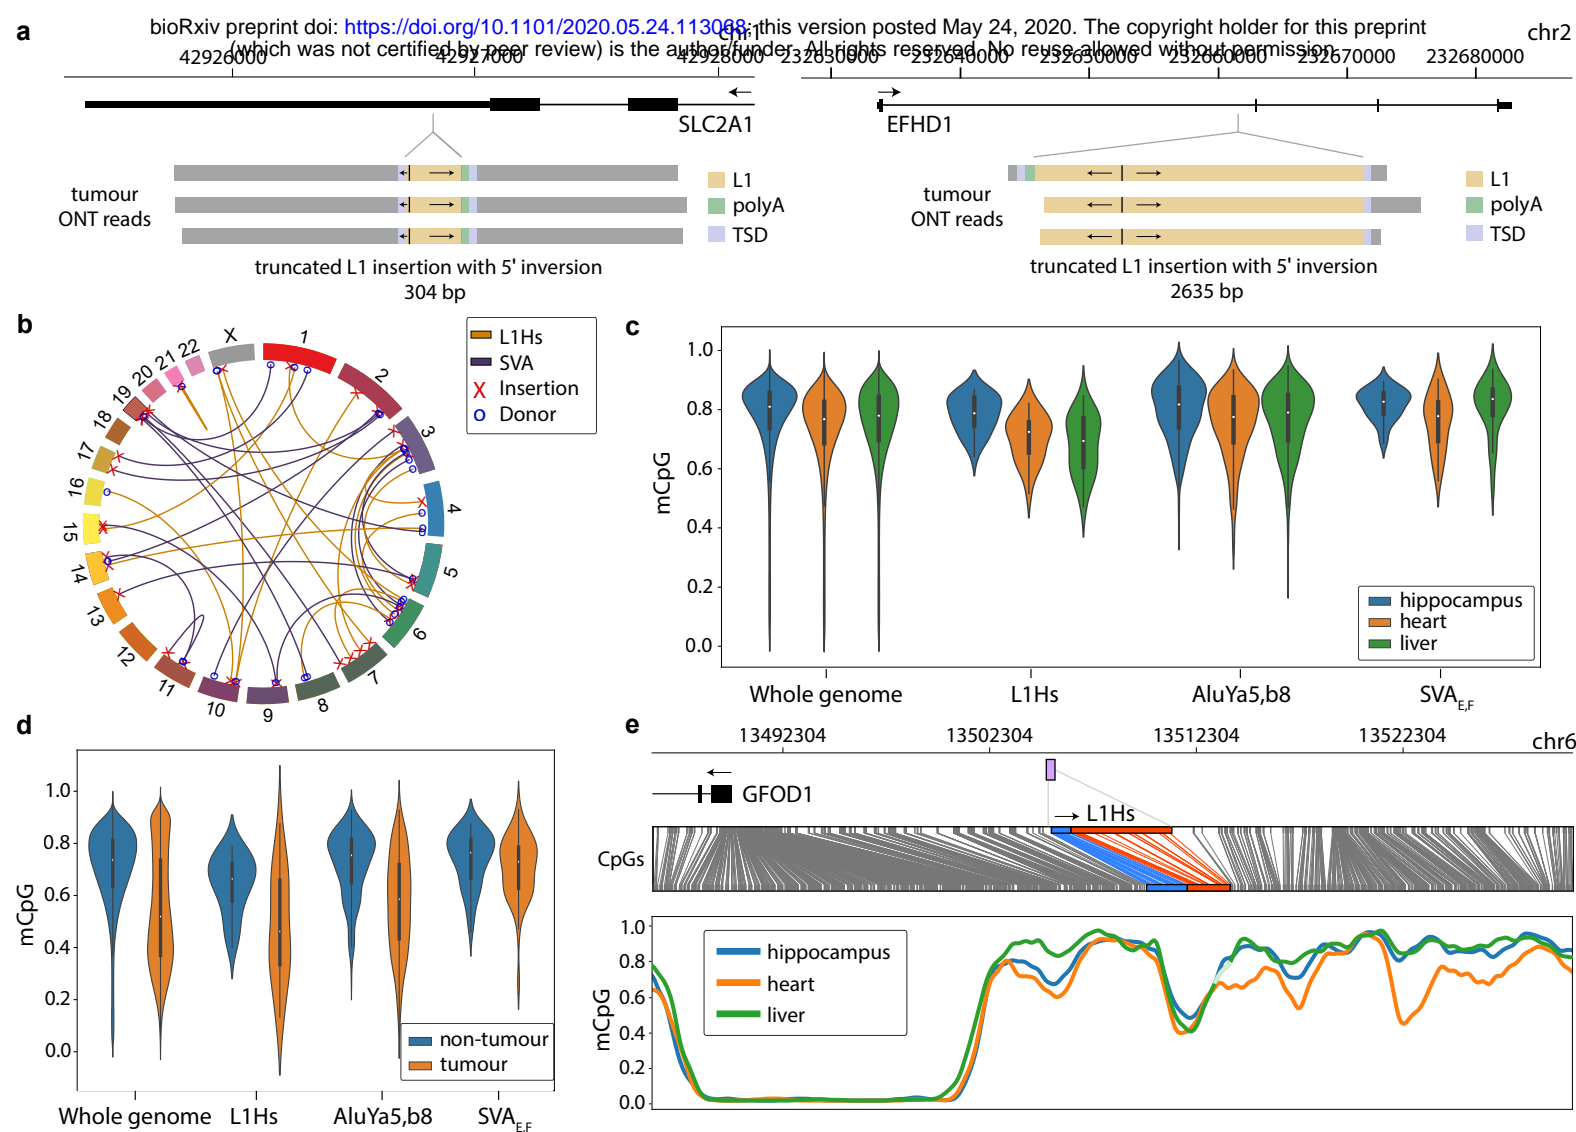

**Fig. 3: Non-reference TE detection and assessment of CpG methylation. (a)** Detection of HCC33 tumour-specific 5' truncated L1Hs insertions. Arrows within L1Hs sequences indicate 5' inversions. **(b)** Source element (donor) to insertion relationships for germline LINE-1 and SVA insertions identified in CTRL-5413 and HCC33 by TLDR. **(c)** Fraction of methylated CpGs in CTRL-5413 tissues, as in Fig. 1c, except for non-reference TE insertions. **(d)** As for (c), except for non-reference TE methylation in HCC33 samples. **(e)** Exemplar methylation profile for a non-reference L1Hs (UUID d11b3baf, Supplementary Table 3a). A purple box indicates the genomic position of the L1Hs upstream of GFOD1 on chromosome 6. The liver smoothed plot line is coloured to appear faded for a short lower confidence region (<20 methylated/demethylated calls within a 30 CpG window). Panels are otherwise as described for Fig. 1d,e. Note: the demethylated region to the left of the L1Hs sequence corresponds to the GFOD1 promoter.

96 To assess the sensitivity of TLDR for germline TE polymorphisms, we compiled a high-  
97 confidence set of known non-reference (KNR) TE insertions reported by at least two  
98 previous studies (Online Methods). We then applied TEBreak to ~45x Illumina whole  
99 genome sequencing generated from CTRL-5413 heart and HCC33 non-tumour liver. Of the  
100 high-confidence germline KNR set, 2464 were detected by TLDR in CTRL-5413 or HCC33  
101 (Supplementary Table 3) and 2533 were called by TEBreak (Supplementary Table 6). A total  
102 of 2357 KNR insertions were reported by both TLDR and TEBreak (Jaccard metric  $\cong 0.96$ ),  
103 indicating high concordance. Consistent with the recent use of PacBio long-read sequencing  
104 to resolve LINE-1 insertions in difficult to map genomic regions<sup>34</sup>, we found non-reference  
105 insertions called only by TLDR covered a much broader spectrum of mappability scores than  
106 those found only by TEBreak or both methods (Supplementary Fig. 11). Notably, TLDR  
107 reports useful sequence features of non-reference TE insertions<sup>1</sup>. These include, for  
108 example, 5' and 3' transductions carried by LINE-1 and SVA insertions<sup>35</sup>, of lengths ranging  
109 here from 31bp to 2072bp, and attributable to their putative source elements (Fig. 3b and  
110 Supplementary Table 4). Internal polymorphisms, such as VNTR length differences within  
111 SVAs (Supplementary Table 3d) are also resolved by TLDR.

112  
113 While somatic methylation appears less ubiquitous as TE subfamilies age (Supplementary  
114 Figs. 2-4), the initial duration required for new TE insertions to be strictly methylated is  
115 unclear. Using TLDR, we established that non-reference TE insertions (Fig. 3c,d) appeared  
116 to be, on average, less methylated than reference elements (Fig. 1b,c) in each of the CTRL-  
117 5413 tissues and HCC33 non-tumour liver. Reference (82.5%) and non-reference (70.6%)  
118 L1Hs insertions exhibited the largest difference ( $P < 5.76e-30$ , Mann-Whitney test) amongst  
119 the analysed TE subfamilies. Of 59 germline TE insertions (10 L1Hs, 46 AluY, 3 SVA)  
120 detected by both TLDR and TEBreak in either CTRL-5413 or HCC33, and absent from prior  
121 studies considered here (Online Methods), we identified 4 full-length L1Hs instances with an  
122 intact 5'UTR CpG island. The average methylation observed for these 4 potentially recent  
123 L1Hs insertions was 65.4%, trending less than the overall non-reference L1 cohort ( $P < 0.056$ ,  
124 Mann-Whitney test). As for individual reference TEs, TLDR can be used to generate  
125 element-specific methylation profiles for non-reference TE insertions (Fig. 3e,  
126 Supplementary Fig. 12 and Supplementary Table 5), including retrotransposition-competent  
127 source L1Hs copies. For example, the non-reference element L1.2, responsible for the first  
128 report of LINE-1 mobility and pathogenesis in humans<sup>7,36</sup>, was ~15% less methylated in  
129 CTRL-5413 liver and heart than in hippocampus (Supplementary Fig. 12a, Supplementary  
130 Table 5). As the vast majority of mobile L1Hs copies in the global population are absent from  
131 the reference genome<sup>6</sup>, the capacity of TLDR to find non-reference L1Hs alleles and survey  
132 their methylation state in parallel is notable.

133

134 Interrogated with TLDR, long-read ONT sequencing has unprecedented utility to detect and  
135 characterise somatic and germline TE insertions, including in genomic regions refractory to  
136 reliable short-read mapping. ONT analysis can provide end-to-end resolution of TE  
137 insertions, without generating molecular artifacts associated with PCR amplification.  
138 Hallmark features of LINE-1 mediated retrotransposition are therefore readily recovered by  
139 TLDR, including relatively long transductions and internal rearrangements. While bisulfite  
140 sequencing depicts CpG methylation at TE termini, ONT analysis yields a direct methylation  
141 readout throughout TE sequences. These attributes mean TLDR has the potential to, for  
142 instance, resolve somatic TE insertions arising during neurodevelopment, and at the same  
143 time infer methylation of the inserted TE, as well as its integration site and source locus. As  
144 shown here for the SVA VNTR and 3' end of the L1Hs 5'UTR, CpG methylation may vary  
145 greatly within mobile TEs. These “sloping shores” of methylation around recently inserted TE  
146 CpG islands<sup>37</sup> have the potential to mislead assays that mainly access TE termini. While  
147 L1Hs locus-specific bisulfite sequencing<sup>19</sup> generates data concordant with those shown  
148 here, ONT analysis is far higher throughput and encompasses all human TE subfamilies.  
149 TLDR therefore makes a broad range of new questions relating to TE biology more  
150 accessible.

151

## 152 **Acknowledgements**

153 The authors thank the human subjects of this study who donated tissues to the MRC  
154 Edinburgh Brain and Tissue Bank and the Centre Hépatobiliaire, Paul-Brousse Hospital. The  
155 authors thank P. Gerdes for helpful discussions, and acknowledge the Translational  
156 Research Institute (TRI) for research space, equipment and core facilities that enabled this  
157 research. This study was funded by the Australian Department of Health Medical Frontiers  
158 Future Fund (MRFF) (MRF1175457 to ADE), the Australian National Health and Medical  
159 Research Council (NHMRC) (GNT1125645, GNT1138795, GNT1173711 to GJF), an  
160 NHMRC Early Career Fellowship (GNT1161832) to SWC, a CSL Centenary Fellowship to  
161 GJF, and by the Mater Foundation (Equity Trustees / AE Hingeley Trust).

162

163 ADE, SWC, and GJF designed the research project, and ADE, NS, SWC and GJF wrote the  
164 manuscript. SWC conducted sample preparation and quality control. FJS-L, JF and PMB  
165 provided resources. ADE and NS developed software tools and analysed the data.

166

## 167 **Methods**

168 See Online Methods.



## References

1. Kazazian, H. H., Jr & Moran, J. V. Mobile DNA in Health and Disease. *N. Engl. J. Med.* **377**, 361–370 (2017).
2. Miga, K. H. *et al.* Telomere-to-telomere assembly of a complete human X chromosome. *bioRxiv* 735928 (2019) doi:10.1101/735928.
3. Jain, M. *et al.* Nanopore sequencing and assembly of a human genome with ultra-long reads. *Nat. Biotechnol.* **36**, 338–345 (2018).
4. Goerner-Potvin, P. & Bourque, G. Computational tools to unmask transposable elements. *Nat. Rev. Genet.* **19**, 688–704 (2018).
5. Brouha, B. *et al.* Hot L1s account for the bulk of retrotransposition in the human population. *Proc. Natl. Acad. Sci. U. S. A.* **100**, 5280–5285 (2003).
6. Beck, C. R. *et al.* LINE-1 retrotransposition activity in human genomes. *Cell* **141**, 1159–1170 (2010).
7. Kazazian, H. H. *et al.* Haemophilia A resulting from de novo insertion of L1 sequences represents a novel mechanism for mutation in man. *Nature* **332**, 164–166 (1988).
8. Dewannieux, M., Esnault, C. & Heidmann, T. LINE-mediated retrotransposition of marked Alu sequences. *Nat. Genet.* **35**, 41–48 (2003).
9. Esnault, C., Maestre, J. & Heidmann, T. Human LINE retrotransposons generate processed pseudogenes. *Nat. Genet.* **24**, 363–367 (2000).
10. Hancks, D. C., Goodier, J. L., Mandal, P. K., Cheung, L. E. & Kazazian, H. H., Jr. Retrotransposition of marked SVA elements by human L1s in cultured cells. *Hum. Mol. Genet.* **20**, 3386–3400 (2011).
11. Ewing, A. D. & Kazazian, H. H. High-throughput sequencing reveals extensive variation in human-specific L1 content in individual human genomes. *Genome Res.* **20**, 1262–1270 (2010).
12. Sudmant, P. H. *et al.* An integrated map of structural variation in 2,504 human genomes. *Nature* **526**, 75–81 (2015).
13. Faulkner, G. J. & Billon, V. L1 retrotransposition in the soma: a field jumping ahead. *Mob. DNA* **9**, 22 (2018).
14. Hancks, D. C. & Kazazian, H. H., Jr. Roles for retrotransposon insertions in human disease. *Mob. DNA* **7**, 9 (2016).
15. Burns, K. H. Transposable elements in cancer. *Nat. Rev. Cancer* **17**, 415–424 (2017).
16. Goodier, J. L. Restricting retrotransposons: a review. *Mob. DNA* **7**, 16 (2016).
17. Yoder, J. A., Walsh, C. P. & Bestor, T. H. Cytosine methylation and the ecology of intragenomic parasites. *Trends Genet.* **13**, 335–340 (1997).
18. Rollins, R. A. *et al.* Large-scale structure of genomic methylation patterns. *Genome Res.* **16**, 157–163 (2006).
19. Sanchez-Luque, F. J. *et al.* LINE-1 Evasion of Epigenetic Repression in Humans. *Mol. Cell* **75**, 590–604.e12 (2019).
20. Salvador-Palomeque, C. *et al.* Dynamic methylation of an L1 transduction family during reprogramming and neurodifferentiation. *Mol. Cell. Biol.* (2019) doi:10.1128/MCB.00499-18.
21. Scott, E. C. *et al.* A hot L1 retrotransposon evades somatic repression and initiates human colorectal cancer. *Genome Res.* **26**, 745–755 (2016).
22. Simpson, J. T. *et al.* Detecting DNA cytosine methylation using nanopore sequencing. *Nat. Methods* **14**, 407–410 (2017).
23. Gigante, S. *et al.* Using long-read sequencing to detect imprinted DNA methylation.

- Nucleic Acids Res.* (2019) doi:10.1093/nar/gkz107.
24. Rodriguez-Martin, B. *et al.* Pan-cancer analysis of whole genomes identifies driver rearrangements promoted by LINE-1 retrotransposition. *Nat. Genet.* **52**, 306–319 (2020).
  25. Pradhan, B. *et al.* Detection of subclonal L1 transductions in colorectal cancer by long-distance inverse-PCR and Nanopore sequencing. *Sci. Rep.* **7**, 14521 (2017).
  26. Schauer, S. N. *et al.* L1 retrotransposition is a common feature of mammalian hepatocarcinogenesis. *Genome Res.* **28**, 639–653 (2018).
  27. Evrony, G. D. *et al.* Cell lineage analysis in human brain using endogenous retroelements. *Neuron* **85**, 49–59 (2015).
  28. Wheelan, S. J., Aizawa, Y., Han, J. S. & Boeke, J. D. Gene-breaking: a new paradigm for human retrotransposon-mediated gene evolution. *Genome Res.* **15**, 1073–1078 (2005).
  29. Gardner, E. J. *et al.* The Mobile Element Locator Tool (MELT): population-scale mobile element discovery and biology. *Genome Res.* **27**, 1916–1929 (2017).
  30. De Cecco, M. *et al.* L1 drives IFN in senescent cells and promotes age-associated inflammation. *Nature* **566**, 73–78 (2019).
  31. Patterson, M. *et al.* WhatsHap: Weighted Haplotype Assembly for Future-Generation Sequencing Reads. *J. Comput. Biol.* **22**, 498–509 (2015).
  32. Wu, H. *et al.* Detection of differentially methylated regions from whole-genome bisulfite sequencing data without replicates. *Nucleic Acids Res.* **43**, e141 (2015).
  33. Shukla, R. *et al.* Endogenous retrotransposition activates oncogenic pathways in hepatocellular carcinoma. *Cell* **153**, 101–111 (2013).
  34. Zhou, W. *et al.* Identification and characterization of occult human-specific LINE-1 insertions using long-read sequencing technology. *Nucleic Acids Res.* **48**, 1146–1163 (2020).
  35. Hancks, D. C., Ewing, A. D., Chen, J. E., Tokunaga, K. & Kazazian, H. H., Jr. Exon-trapping mediated by the human retrotransposon SVA. *Genome Res.* **19**, 1983–1991 (2009).
  36. Dombroski, B. A., Mathias, S. L., Nanthakumar, E., Scott, A. F. & Kazazian, H. H. Isolation of an active human transposable element. *Science* **254**, 1805–1808 (1991).
  37. Grandi, F. C. *et al.* Retrotransposition creates sloping shores: a graded influence of hypomethylated CpG islands on flanking CpG sites. *Genome Res.* **25**, 1135–1146 (2015).
